# Supplementary material
Source: PubMed Central journal article supplement (PMC1409715)
Supplement: 7600998s1.pdf [file 7600998s1.pdf]

Figure S1

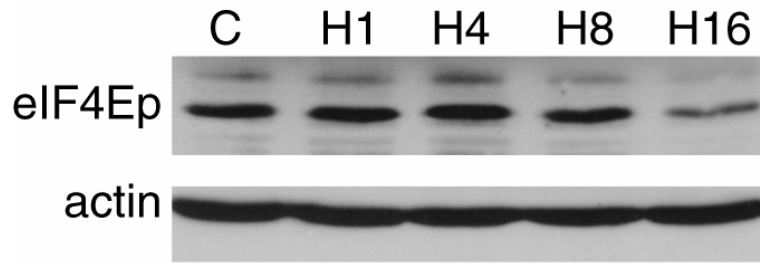

**Figure S1: Hypoxia causes eIF4E dephosphorylation.** HeLa cells were exposed to 0.0% O<sub>2</sub> for 0-16 hours. Cell lysates were separated by SDS-PAGE. Immunoblots were performed using antibodies against phosphorylated eIF4E and  $\beta$ -actin.
