# Supplementary material
Source: PubMed Central journal article supplement (PMC1409715)
Supplement: 7600998s2.pdf [file 7600998s2.pdf]

Figure S2

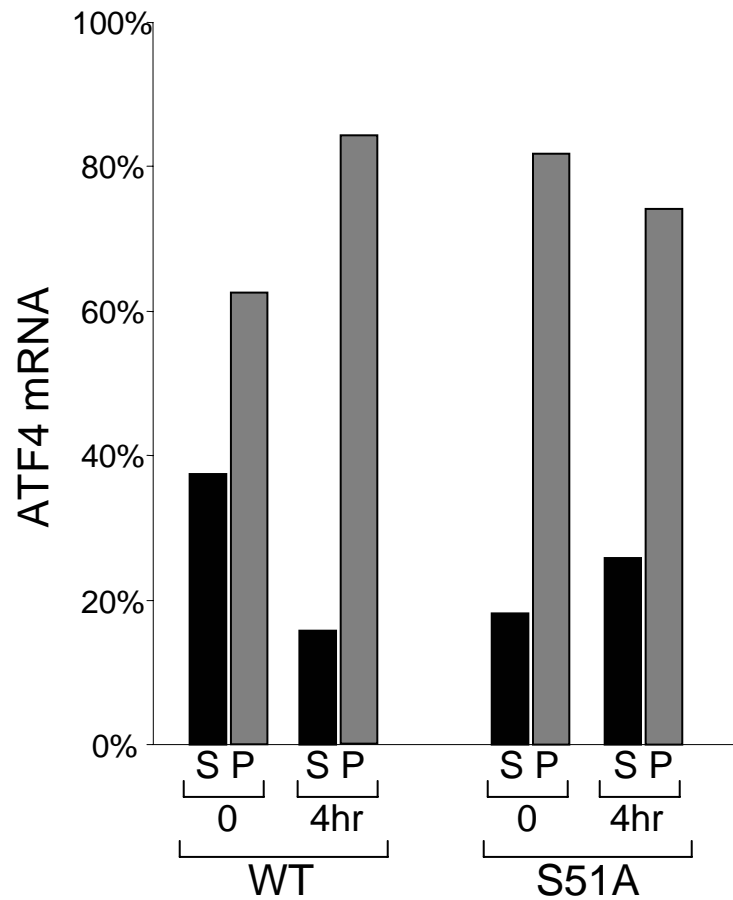

**Figure S2: Hypoxia-induced increase in the translation efficiency of ATF-4 is dependent upon eIF2 $\alpha$ .** WT and S51A MEFs were exposed to 0.0% O<sub>2</sub> for 0-4 hours and cell lysates were separated on a sucrose gradient. RNA was collected in two fractions representing sub-polysomal (S) or polysomal (P) particles respectively. Following RNA isolation and reverse transcription, abundance of ATF4 was determined using real-time quantitative PCR.
